# Supplementary material
Source: PubMed Central journal article supplement (PMC3133974)

## References

1. Burstein, M., HR. Scholnick, and R. Morfin. Rapid method for the isolation of lipoproteins from human serum by precipitation with polyanions. *J Lipid Res.* 1970;11: 583-595.
2. Usui, S., Y. Hara, S. Hosaki, and M. Okazaki. A new on-line dual enzymatic method for simultaneous quantification of cholesterol and triglycerides in lipoproteins by HPLC. *J Lipid Res.* 2002; 43:805-814.

## Supplemental Figure Legends

### Supp. Figure 1.

After 0, 0.25, 0.5, 1, 2, 4, 6  $\mu$ l standard plasma (type A apoA-II concentration : 25mg/dL) were separated by SDS-PAGE, apoA-II was determined by western blot analysis with specific antisera. The standard curve demonstrated a linear relationship between area measurements and the amount of standard plasma or apoA-II in the range of 1–4  $\mu$ l or 0.25  $\mu$ g–1  $\mu$ g respectively. Thus, we could estimate apoA-II concentrations from 12.5 to 50 mg/dL using 2  $\mu$ l plasma. A. Result of western blot analysis. B. Area measurements of each band were quantitated using a densitometric image analyzer with NIH Image.

Supplemental table 1.

Comparison of plasma HDL cholesterol concentration determined by precipitation method (HDL-cholesterol E-Test) and HPLC procedure<sup>a</sup>

| Strain | (M) | Injected amyloid fibrils <sup>b</sup> | HDL-C                     |      | TC                     |      | (mg/dl) |
|--------|-----|---------------------------------------|---------------------------|------|------------------------|------|---------|
|        |     |                                       | HDL-C E-test <sup>c</sup> | HPLC | TC E-test <sup>c</sup> | HPLC |         |
| WT     | 0   | DDW                                   | 47.0±10.8                 | 48.5 | 63.6±13.4              | 63.2 |         |
| WT     | 4   | DDW                                   | 35.8±3.2                  | 39.6 | 52.6±3.9               | 55.8 |         |
| WT     | 4   | AApoAII(C) 100 µg                     | 37.5±9.9                  | 43.6 | 60.0±3.8               | 62.2 |         |
| KO     | 0   | DDW                                   | 10.4±0.7                  | 5.0  | 14.6±1.6               | 14.2 |         |
| KO     | 4   | DDW                                   | 24.6±0.7                  | 23.1 | 36.1±1.9               | 43.0 |         |
| KO     | 4   | AApoAII(C) 100 µg                     | 16.6±1.9                  | 11.5 | 25.6±2.2               | 27.0 |         |

<sup>a</sup> HDL-C was estimated according to a phosphotungstic acid-magnesium salt precipitation method (HDL-cholesterol E-Test kit) (1). Plasma total cholesterol was determined using an enzymatic procedure (Total cholesterol E-test kit). HDL-C and TC of pooled plasma were also analyzed with an enzymatic procedure following HPLC (2).

<sup>b</sup> 2-month-old female mice were injected with either DDW or 100 µg AApoAII(C) amyloid fibrils. Before and 4 months after injection, plasma was collected from mice that had fasted overnight.

<sup>c</sup> Values are means ± sd. n = 3.

Supplemental Figure 1

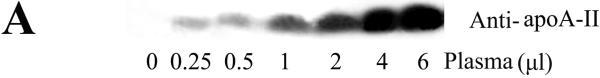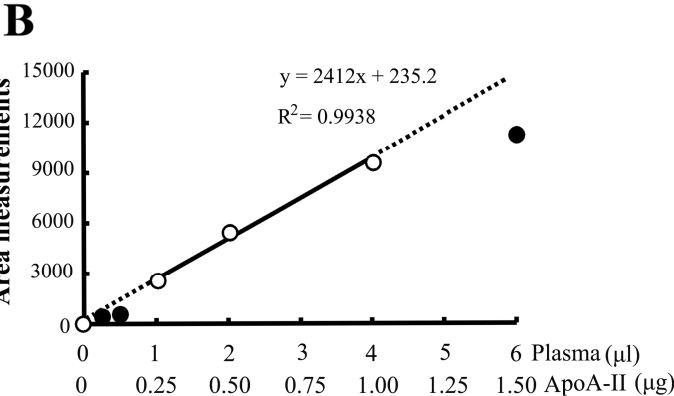

Supplement: supp_M013235_jlr.M013235-1.pdf [file supp_M013235_jlr.M013235-1.pdf]
